# Supplementary material
Source: Springer Nature journal article supplement (https://www.springermedizin.de/resource/supplementary/12888_2009_674_MOESM2_ESM.doc/9478124)

**Figure 1: Mean CES-D scores among HIV-negativea and HIV-positiveb individuals**

**
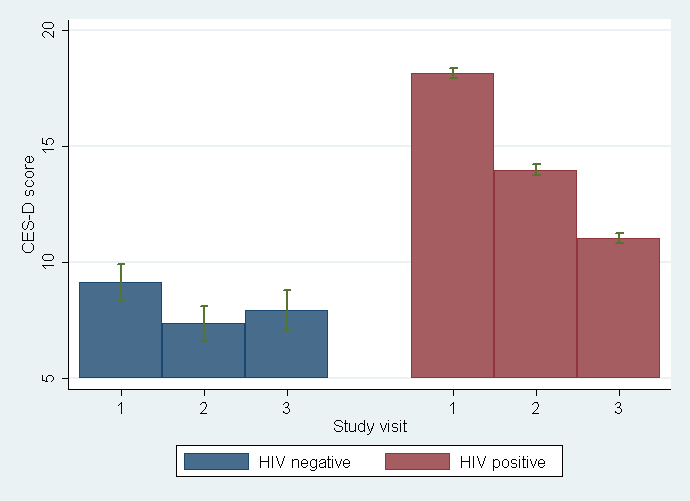
**

Supplement: MOESM2 [file 9478124]
